# Supplementary material for: Talazoparib in Patients with a Germline BRCA‐Mutated Advanced Breast Cancer: Detailed Safety Analyses from the Phase III EMBRACA Trial
Source: PubMed Central journal article supplement — Oncologist. 2019 Nov 25;25(3):e439–50. doi: 10.1634/theoncologist.2019-0493 (PMC7066700; doi:10.1634/theoncologist.2019-0493), 2019-11-25
Supplement: ONCO-25-e439-s001.pdf [file ONCO-25-e439-s001.pdf]

Supplemental Figures for:  
Talazoparib in Patients with a Germline BRCA-mutated Advanced Breast Cancer: Detailed Safety Analyses from the Phase 3 EMBRACA Trial Sara Hurvitz et al.

**Figure S1.** Cumulative risk plot for time to first TEAE: (A) anemia, neutropenia, thrombocytopenia<sup>a</sup>; (B) nausea, fatigue, vomiting, alopecia<sup>b</sup> (safety population – talazoparib)

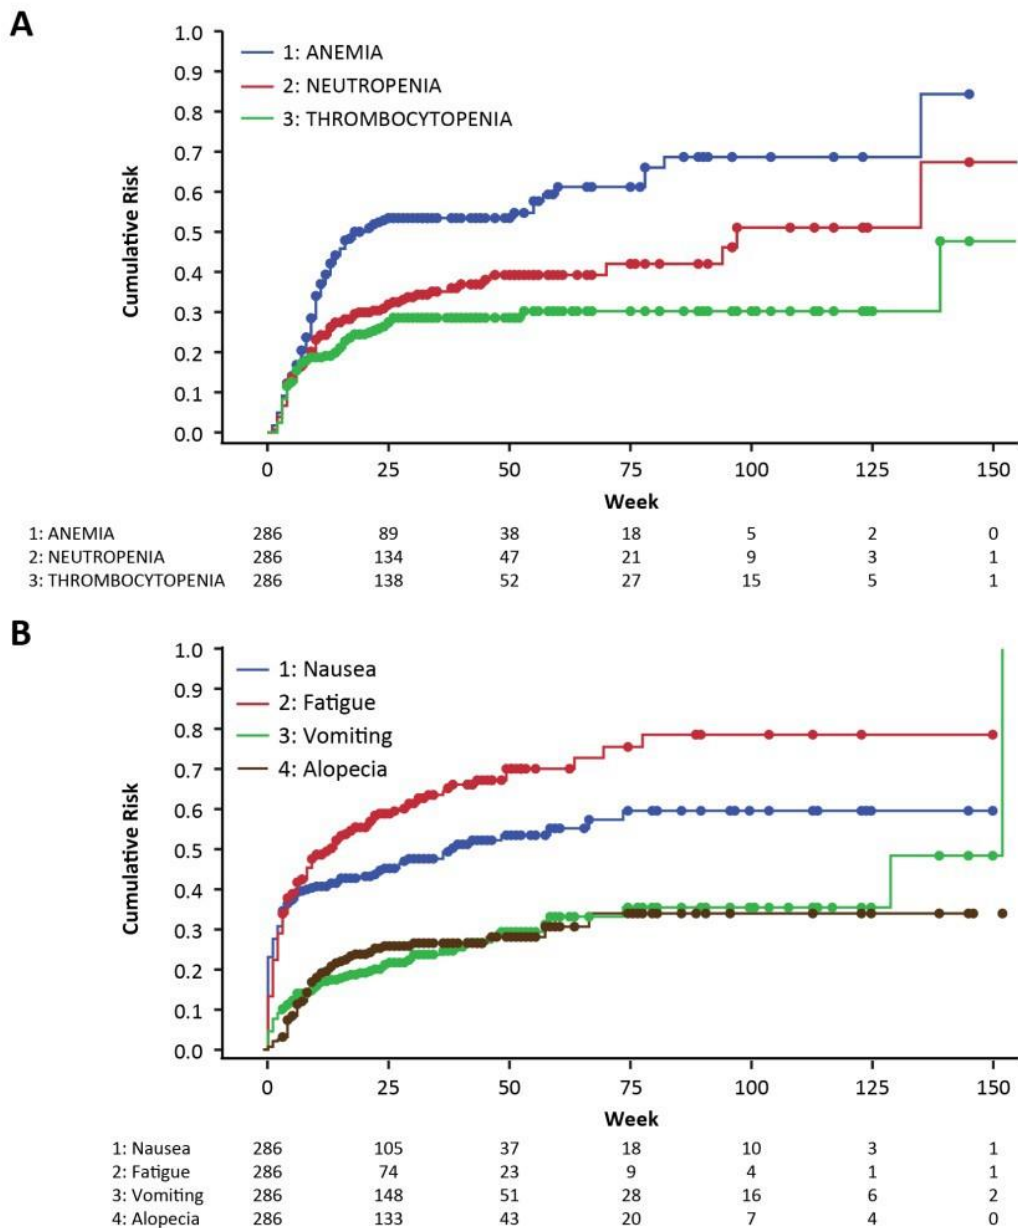

<sup>a</sup>ANEMIA includes preferred terms: anemia, decreased hemoglobin, decreased hematocrit. NEUTROPENIA includes preferred terms: neutropenia, decreased neutrophil count. THROMBOCYTOPENIA includes preferred terms: thrombocytopenia, platelet count decreased. <sup>b</sup>Nonhematologic AEs (fatigue, nausea, alopecia, vomiting) are based on a single preferred term.

**Figure S2.** Time to onset of (A) first treatment-emergent hematologic grade  $\geq 3$  AEs and (B) selected first treatment-emergent nonhematologic<sup>a</sup> grade  $\geq 2$  AEs.

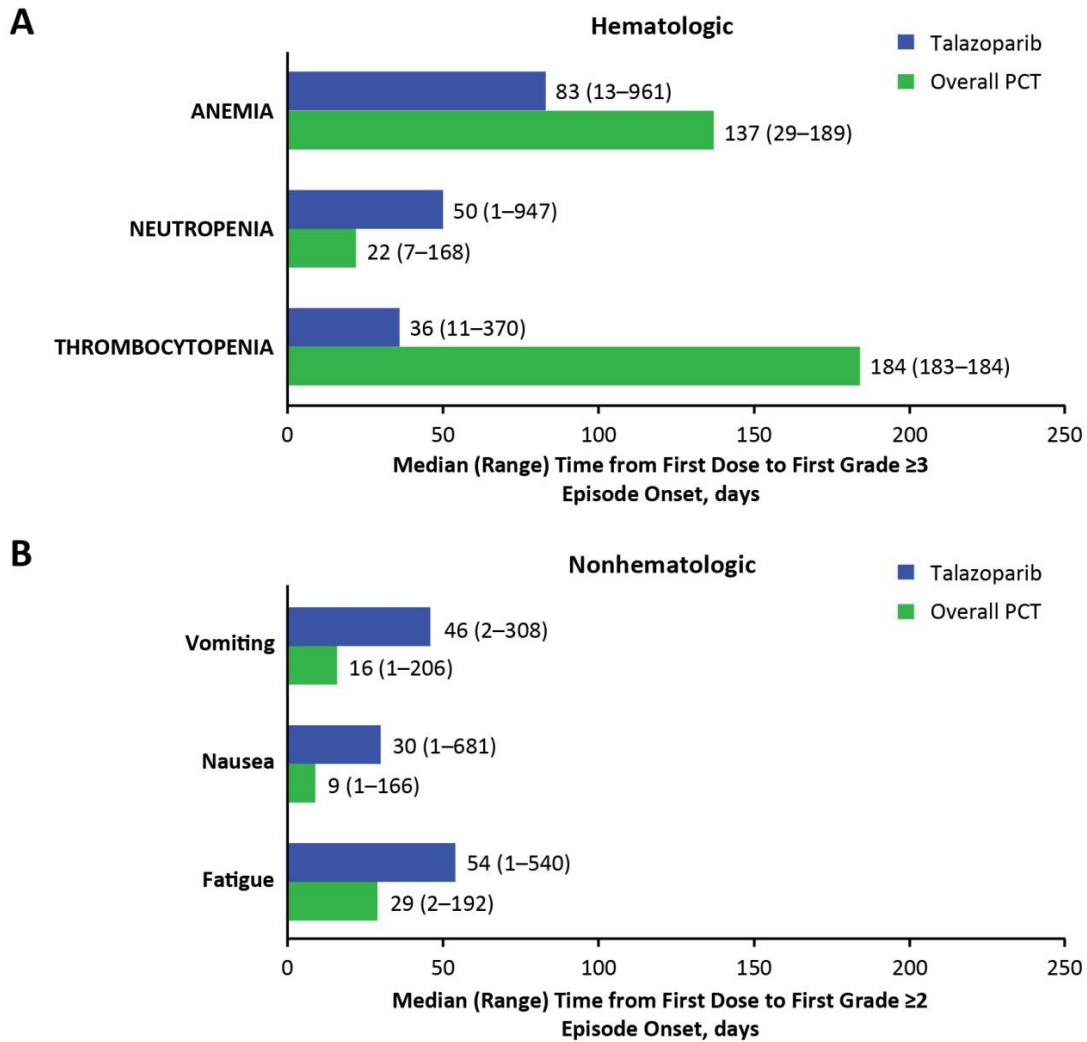

<sup>a</sup>Nonhematologic adverse events (nausea, vomiting) are based on a single preferred term, whereas fatigue was inclusive of fatigue/asthenia. ANEMIA includes preferred terms: anemia, decreased hemoglobin, decreased hematocrit. NEUTROPENIA includes preferred terms: neutropenia, decreased neutrophil count. THROMBOCYTOPENIA includes preferred terms: thrombocytopenia, platelet count decreased.

Abbreviation: PCT, physician’s choice of chemotherapy.



### C. Vomiting

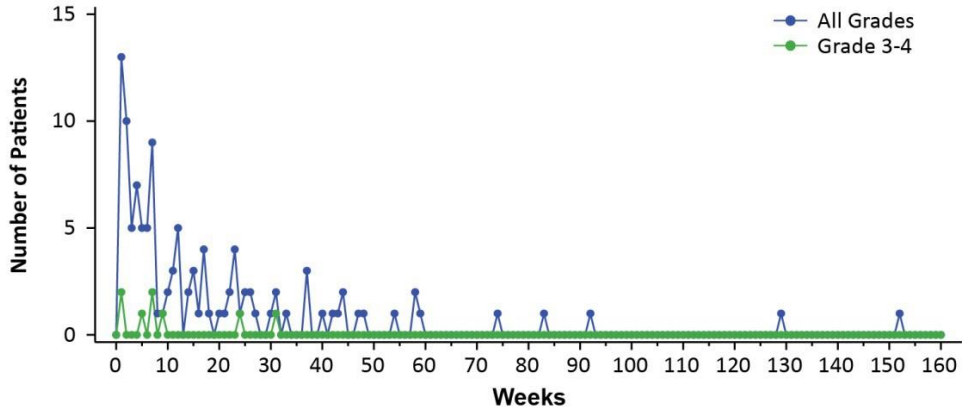

|                       |     |     |     |     |    |    |    |    |    |    |    |    |    |   |   |   |   |
|-----------------------|-----|-----|-----|-----|----|----|----|----|----|----|----|----|----|---|---|---|---|
| Patients at risk:     | 286 | 258 | 201 | 138 | 91 | 64 | 43 | 38 | 30 | 22 | 18 | 14 | 12 | 7 | 6 | 3 | 3 |
| Patients with TEAEs:  |     |     |     |     |    |    |    |    |    |    |    |    |    |   |   |   |   |
| All Grades <i>n</i> = | 0   | 2   | 1   | 1   | 1  | 0  | 0  | 0  | 0  | 0  | 0  | 0  | 0  | 0 | 0 | 0 | 0 |
| Grade 3-4 <i>n</i> =  | 0   | 0   | 0   | 0   | 0  | 0  | 0  | 0  | 0  | 0  | 0  | 0  | 0  | 0 | 0 | 0 | 0 |

### D. Nausea

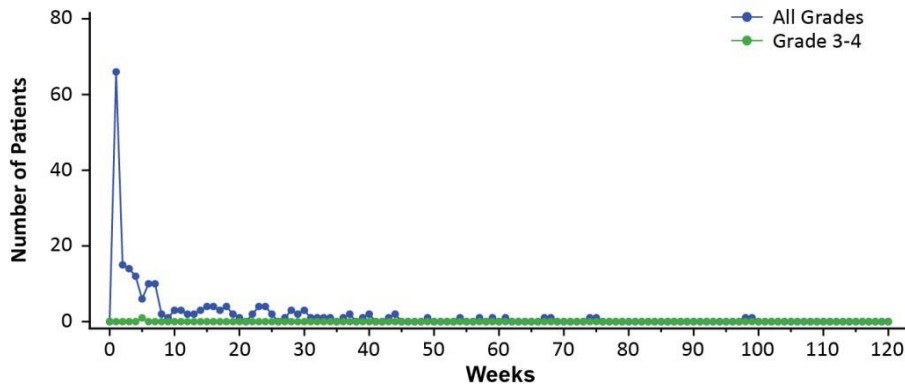

|                       |     |     |     |     |    |    |    |    |    |    |    |    |    |
|-----------------------|-----|-----|-----|-----|----|----|----|----|----|----|----|----|----|
| Patients at risk:     | 286 | 258 | 201 | 138 | 91 | 64 | 43 | 38 | 30 | 22 | 18 | 14 | 12 |
| Patients with TEAEs:  |     |     |     |     |    |    |    |    |    |    |    |    |    |
| All Grades <i>n</i> = | 0   | 3   | 1   | 3   | 2  | 0  | 0  | 0  | 0  | 0  | 0  | 0  | 0  |
| Grade 3-4 <i>n</i> =  | 0   | 0   | 0   | 0   | 0  | 0  | 0  | 0  | 0  | 0  | 0  | 0  | 0  |

Abbreviations: PCT, physician’s choice of chemotherapy; TEAE, treatment-emergent adverse event.

**Figure S4.** Incidence of grade 3-4 TEAEs (hematologic) after the first dose reduction due to TEAEs by decreasing frequency of preferred term

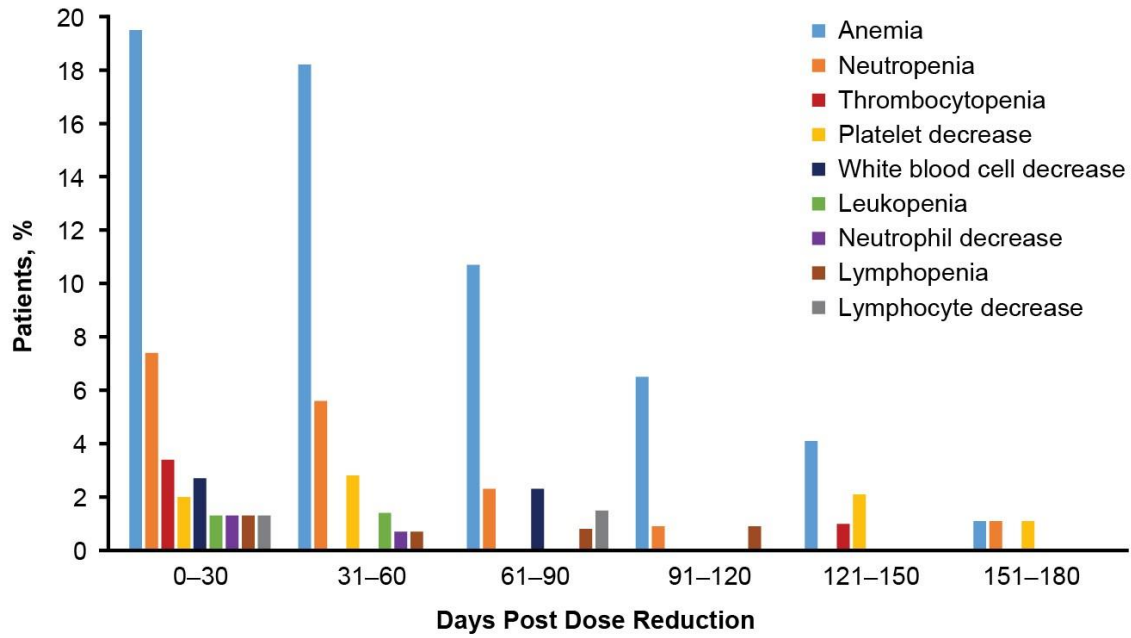

**Figure S5.** Landmark analysis of PFS based on independent radiology facility assessment at (A) 12 weeks, (B) 18 weeks, and (C) 24 weeks (intent-to-treat population)

**A. Landmark 12 weeks**

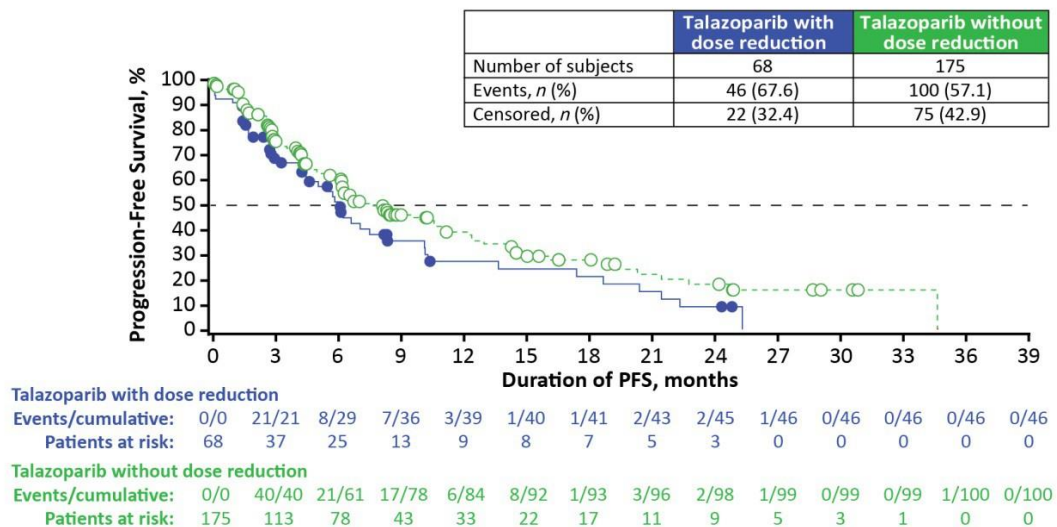

**B. Landmark 18 weeks**

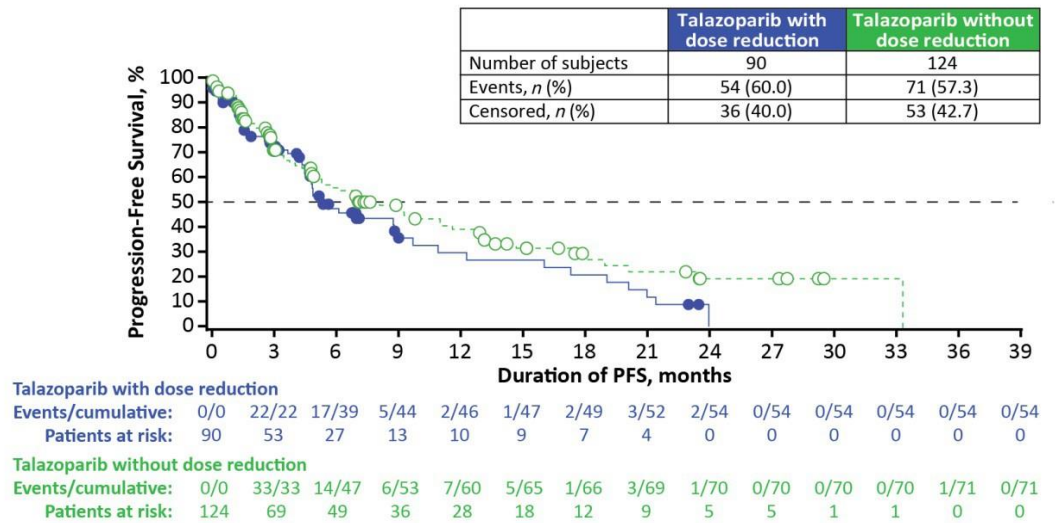

### C. Landmark 24 weeks

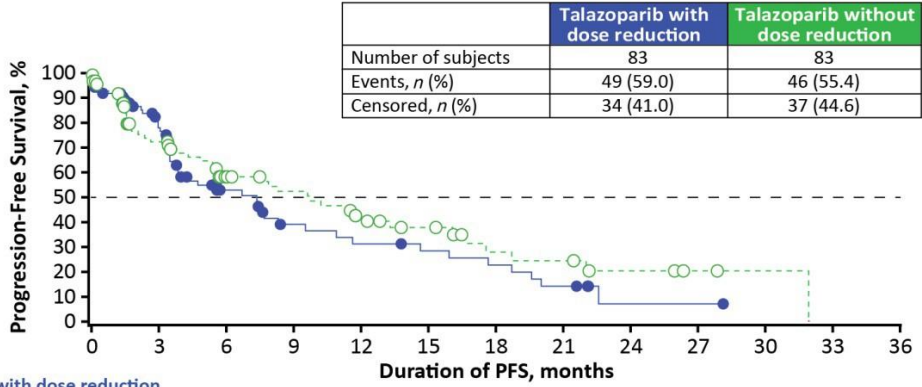

|                                           | 0   | 3     | 6     | 9    | 12   | 15   | 18   | 21   | 24   | 27   | 30   | 33   | 36   |
|-------------------------------------------|-----|-------|-------|------|------|------|------|------|------|------|------|------|------|
| <b>Talazoparib with dose reduction</b>    |     |       |       |      |      |      |      |      |      |      |      |      |      |
| Events/cumulative:                        | 0/0 | 17/17 | 16/33 | 6/39 | 3/42 | 1/43 | 2/45 | 3/48 | 1/49 | 0/49 | 0/49 | 0/49 | 0/49 |
| Patients at risk:                         | 83  | 54    | 24    | 15   | 12   | 10   | 8    | 5    | 1    | 1    | 0    | 0    | 0    |
| <b>Talazoparib without dose reduction</b> |     |       |       |      |      |      |      |      |      |      |      |      |      |
| Events/cumulative:                        | 0/0 | 21/21 | 9/30  | 3/33 | 6/39 | 1/40 | 3/43 | 1/44 | 1/45 | 0/45 | 0/45 | 1/46 | 0/46 |
| Patients at risk:                         | 83  | 50    | 33    | 27   | 18   | 14   | 8    | 7    | 4    | 2    | 1    | 0    | 0    |

**Figure S6.** Histogram of last hemoglobin before (A) 1st, (B) 2nd, and (C) 3<sup>rd</sup> PRBC transfusion in the talazoparib arm (safety population)

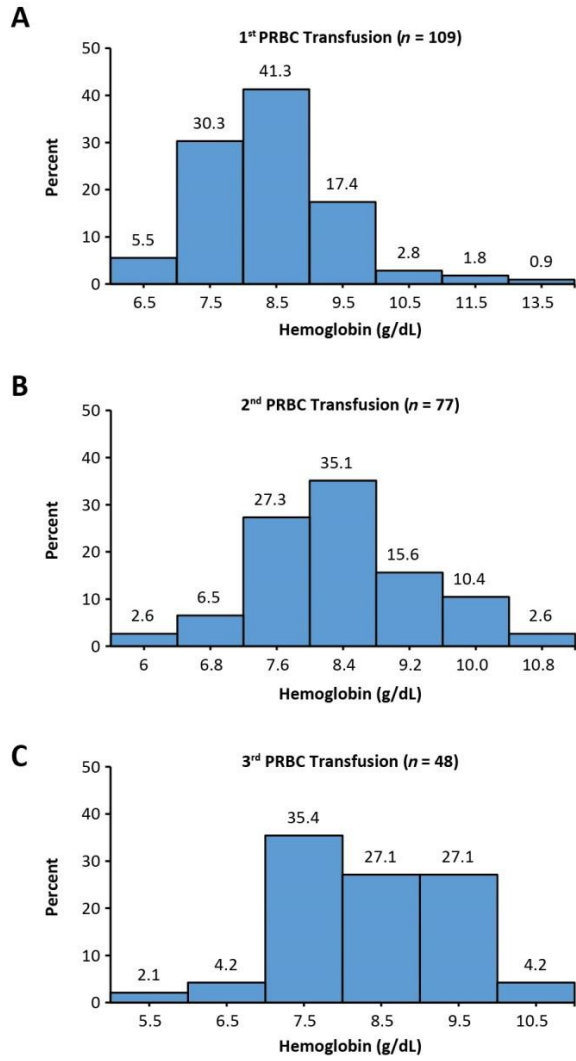



**Figure S7.** Patient-reported outcomes in patients with anemia AEs who did not receive PRBC transfusion and/or antianemic medication (A<sup>a</sup> and B<sup>a</sup>) or patients with nausea/vomiting AEs who did not receive antiemetic and/or antinauseant (C<sup>a</sup> and D<sup>a</sup>)

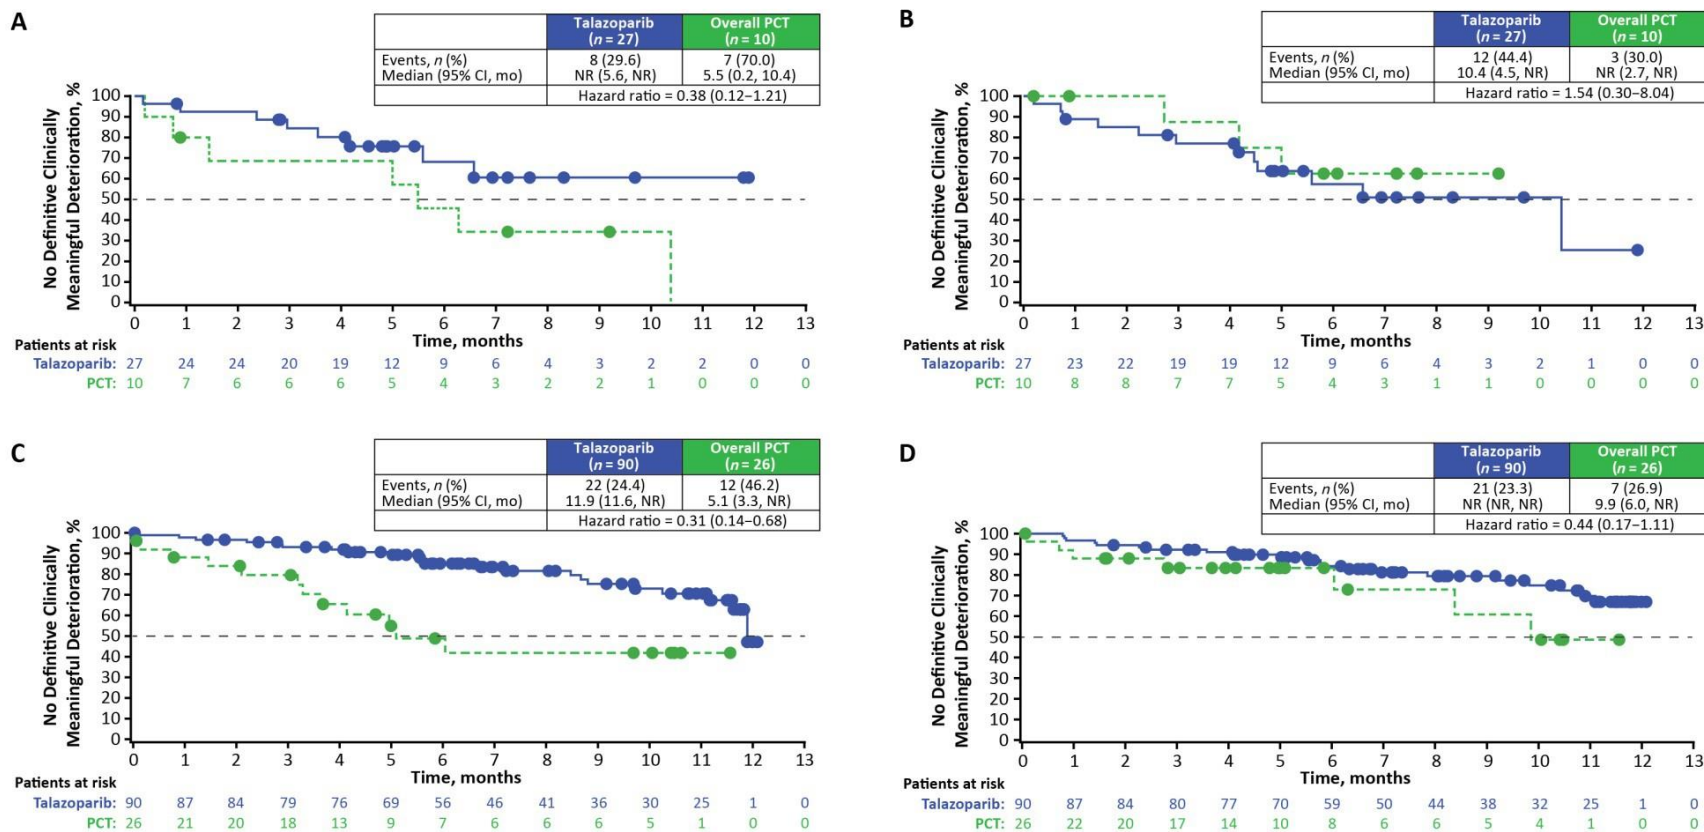

A, C = GHS/QoL; B = patient-reported fatigue; D = patient-reported nausea and vomiting. TTD (PRO evaluable subpopulation). Time to definitive clinically meaningful deterioration for GHS/QoL was defined as the time from randomization to the first observation with a  $\geq 10$ -point decrease and no subsequent observations with a  $< 10$ -point decrease from baseline. Time to definitive clinically meaningful deterioration on the fatigue and nausea/vomiting scales was defined as the time from randomization to the first observation with a  $\geq 10$ -point increase and no subsequent observations with a  $< 10$ -point increase from baseline.

Due to the small sample size of patients post week 52 in EMBRACA (as observed in Figure 3A and Figure S3C and SCD, respectively), the PRO analyses focused on the PRO evaluable population during the first 52 weeks of EMBRACA. The PRO-evaluable population was defined as patients who completed  $\geq 1$  question at baseline and  $\geq 1$  time point post baseline.

Abbreviations: CI, confidence interval; EORTC, European Organisation for Research and Treatment of Cancer; GHS, global health status; HR+, hormone receptor positive; NR, not reported; PCT, physician's choice of chemotherapy treatment; PRO, patient-reported outcomes; QLQ-BR23, Quality of Life Questionnaire breast cancer module; QLQ-C30, Quality of Life Questionnaire Core 30; QoL, quality of life; TTD, time to definitive clinically meaningful deterioration.
